# Supplementary material for: Metagenomic Insight into Environmentally Challenged Methane-Fed Microbial Communities
Source: MDPI journal article supplement (doi:10.3390/microorganisms8101614), 2020-10-20

# Bacteriovorax

## Percentage Identity

70% 100%

## Alignment Coverage

37% 100%

***Bacteriovorax stolpii* DSM 12778**

***Bacteriovorax stolpii* UKi2**

1056022\_5

**Bacteriovorax bin63**

**1056160\_2**

**1056193\_5**

**1056055\_2**

**1056088\_1**

**1056025\_2**

**1056118\_1**

**1056217\_3**

1056217-3

1056118-1

**1056025\_2**

1056088-1

**1056055-2**

1056193-5

**1056160-2**

***Bacteriovorax bin63***

1056022\_5

***Bacteriovorax stolpii* UK12**

***Bacteriovorax stolpii* DSM 12778**

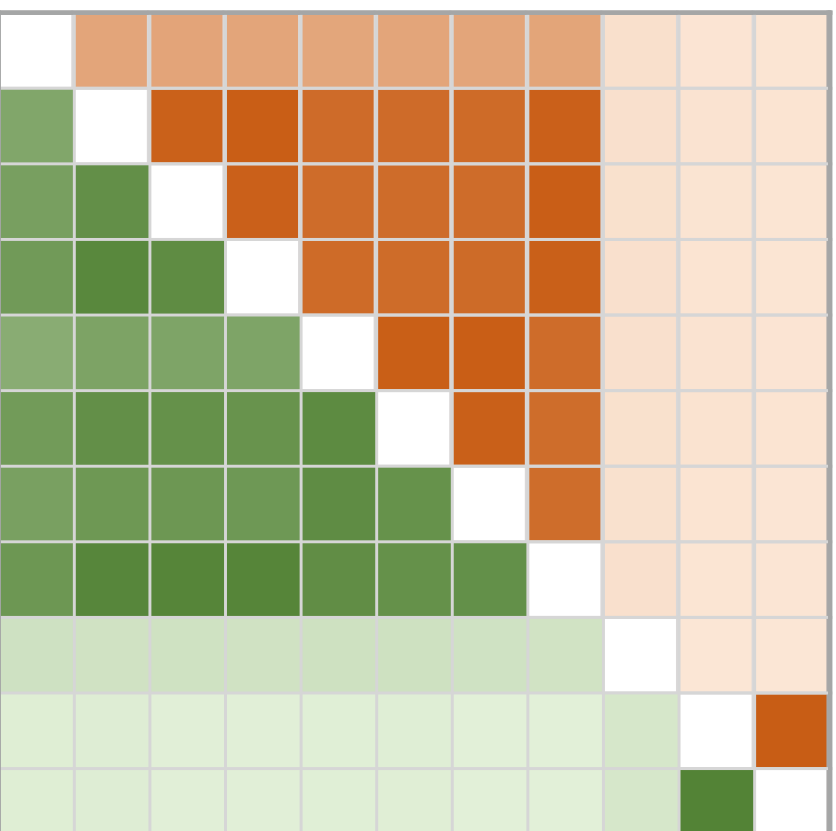

Supplement: s1 [file s1]
