# Supplementary material for: Metagenomic Insight into Environmentally Challenged Methane-Fed Microbial Communities
Source: MDPI journal article supplement (doi:10.3390/microorganisms8101614), 2020-10-20

## *Lacunisphaera*

Percentage Identity

70%  100%

Alignment Coverage

37%  100%

## *Lacunisphaera limnophila*

1056094\_3

1056070\_3

1056067\_2

1056064\_3

1056040\_5

1056040\_5

1056064\_3

1056067\_2

1056070\_3

1056094\_3

*Lacunisphaera limnophila*

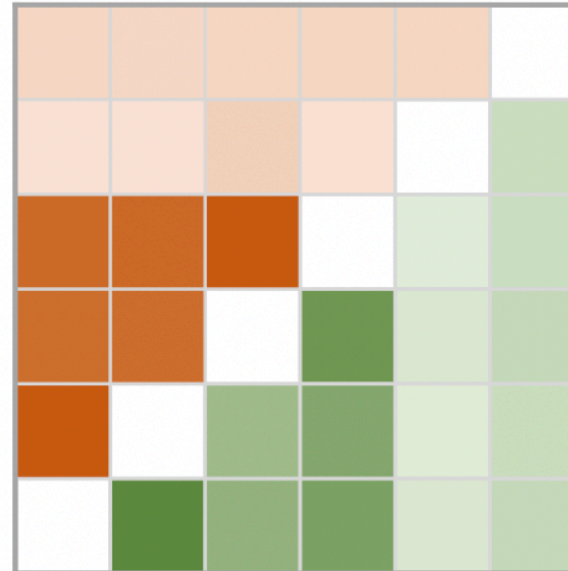

Supplement: s1 [file s1]
